# Supplementary material for: A Novel Multimodal Combining Radiomics and Tumor-Stroma Ratio (TSR) Improves Diagnosis of Gastric Cancer Peritoneal Metastasis
Source: Research Square preprint supplement (doi:10.21203/rs.3.rs-7336599/v1), 2025-09-03
Supplement: Supplementary file 1 [file 0db71cfe415a3ad990b1e90a.docx]

**Tab.2 Univariate and Multivariate Regression Analysis in the Training Cohort.**

| **Characteristics** | **Total(N)** | **Univariate analysis** | | **Multivariate analysis** | |
| --- | --- | --- | --- | --- | --- |
| **Odds Ratio (95% CI)** | **P value** | **Odds Ratio (95% CI)** | **P value** |
| **BMI** | 432 | 0.943(0.881 - 1.005) | 0.080 |  |  |
| **WBC** | 432 | 1.169(1.073 - 1.276) | **< 0.001** | 0.925(0.792 - 1.077) | 0.321 |
| **Neut%** | 432 | 1.047(1.027 - 1.068) | **< 0.001** | 1.030(0.993 - 1.080) | 0.147 |
| **Lmph%** | 432 | 0.947(0.925 - 0.968) | **< 0.001** | 0.999(0.949 -1.063) | 0.992 |
| **Hb** | 432 | 1.001(0.997 - 1.004) | 0.657 |  |  |
| **PLT** | 432 | 1.004(1.002 - 1.006) | **< 0.001** | 0.999(0.996 - 1.002) | 0.481 |
| **MPV** | 432 | 0.858(0.713 - 1.029) | 0.101 |  |  |
| **PDW** | 432 | 0.915(0.832 - 1.003) | 0.063 |  |  |
| **Neu** | 432 | 1.076(1.004 - 1.177) | 0.079 |  |  |
| **Lymph** | 432 | 0.865(0.641 - 1.042) | 0.281 |  |  |
| **NLR** | 432 | 0.999(0.957 - 1.006) | 0.772 |  |  |
| **Alb** | 432 | 0.920(0.886 - 0.955) | **< 0.001** | 0.937(0.865 - 1.010) | 0.099 |
| **PNI** | 432 |  |  |  |  |
| <45 | 144 | Reference |  |  |  |
| ≥45 | 288 | 0.456(0.292 - 0.711) | **< 0.001** | 1.782(0.683 - 4.788) | 0.243 |
| **A/G** | 432 | 0.372(0.185 - 0.727) | 0.005 | 0.750(0.272 - 1.335) | 0.507 |
| **AFP** | 432 | 1.040(0.996 - 1.103) | 0.126 |  |  |
| **CEA** | 432 | 1.004(0.998 - 1.012) | 0.194 |  |  |
| **CA125** | 432 | 1.030(1.019 - 1.040) | **< 0.001** | 1.025(1.012 - 1.039) | **< 0.001** |
| **CA199** | 432 | 1.000(0.999 - 1.001) | 0.824 |  |  |
| **CA724** | 432 | 1.040(1.026 - 1.057) | **< 0.001** | 1.026(1.011 - 1.045) | **0.002** |
| **Site** | 432 |  |  |  |  |
| 0 | 10 | Reference |  |  |  |
| 1 | 91 | 0.507(0.133 - 2.131) | 0.325 |  |  |
| 2 | 87 | 0.917(0.244 - 3.809) | 0.899 |  |  |
| 3 | 244 | 0.396(0.109 - 1.599) | 0.164 |  |  |
| **Size** | 432 | 1.291(1.190 - 1.405) | **< 0.001** | 0.957(0.849 - 1.076) | 0.46 |
| **T** | 432 |  |  |  |  |
| T1+T2 | 118 | Reference |  | Reference |  |
| T3+T4 | 314 | 3.898(2.122 - 7.766) | **< 0.001** | 0.675(0.267 - 1.747) | 0.409 |
| **Borrmann** | 432 |  |  |  |  |
| 0 | 97 | Reference |  | Reference |  |
| 1 | 335 | 22.909(7.067 - 140.603) | **< 0.001** | 10.191(2.620 - 68.253) | **0.003** |
| **Diff** | 432 |  |  |  |  |
| 0 | 16 | Reference |  |  |  |
| 1 | 5 | 0.000(0.000 - 1136.130) | 0.983 |  |  |
| 2 | 90 | 0.423(0.106 - 2.114) | 0.245 |  |  |
| 3 | 321 | 1.961(0.616 - 8.689) | 0.302 |  |  |
| **RadiomicsFeatures** | 432 | 663.600(164.242 - 2959.657) | **< 0.001** | 207.221(36.338 -1322.850) | **< 0.001** |
| **TSR** | 432 |  |  |  |  |
| Low | 247 | Reference |  | Reference |  |
| High | 185 | 3.398(2.174 - 5.379) | **< 0.001** | 2.351(1.333 - 4.192) | **0.003** |

*OR: odds ratio; CI: confidence interval; Borrmann type (0=type Ⅰ and Ⅱ; 1= type Ⅲ and Ⅳ), Diff (0=undifferentiated, 1=low differentiation, 2 =medium differentiation, and 3 = high differentiation).
