# Supplementary material for: A Novel Multimodal Combining Radiomics and Tumor-Stroma Ratio (TSR) Improves Diagnosis of Gastric Cancer Peritoneal Metastasis
Source: Research Square preprint supplement (doi:10.21203/rs.3.rs-7336599/v1), 2025-09-03
Supplement: Supplementary file 2 [file 5c206b59f8c42b4f3a4c1aad.docx]

**Tab.1. Baseline Characteristics of Patients in the Training Cohort, Validation Cohort, and metachronous PM Cohort.**

| **Characteristic** | | **Training cohort** | | ***P*** | **Validation cohort** | | ***P*** | **metachronous PM cohort** | | ***P*** |
| --- | --- | --- | --- | --- | --- | --- | --- | --- | --- | --- |
|  | **group** | **Non-PM *n* = 321** | **PM *n* = 111** | **Non-PM *n* = 327** | **PM *n* = 54** | **Non-PM *n* = 586** | **PM *n* =62** |
| **Gender** | **Female** | 106 (33%) | 37 (33%) | >0.9 | 106 (32%) | 20 (37%) | 0.5 | 188 (32%) | 24 (39%) | 0.3 |
|  | **Male** | 215 (67%) | 74 (67%) |  | 221 (68%) | 34 (63%) |  | 398 (68%) | 38 (61%) |  |
| **Age** | **<65** | 203 (63%) | 74 (67%) | 0.5 | 206 (63%) | 31 (57%) | 0.4 | 374 (64%) | 35 (56%) | 0.3 |
|  | **>=65** | 118 (37%) | 37 (33%) |  | 121 (37%) | 23 (43%) |  | 212 (36%) | 27 (44%) |  |
| **BMI** |  | 21.8 (19.5, 24.0) | 20.5 (18.9, 23.1) | **0.014** | —— | —— | —— | —— | —— | —— |
| **WBC** |  | 6.05 (5.04, 7.66) | 6.86 (5.42, 9.39) | **0.001** | 6.14 (5.02, 7.78) | 6.34 (5.14, 7.86) | 0.7 | 6.04 (4.97, 7.66) | 6.75 (5.53, 8.60) | **0.008** |
| **Neut%** |  | 58 (52, 67) | 66 (59, 73) | **<0.001** | 63 (55, 72) | 68 (58, 75) | **0.020** | 60 (52, 68) | 68 (62, 76) | **<0.001** |
| **Lmph%** |  | 29 (22, 36) | 23 (17, 29) | **<0.001** | 27 (19, 33) | 21 (16, 29) | **0.014** | 28 (22, 35) | 20 (14, 28) | **<0.001** |
| **Hb** |  | 121 (98, 137) | 111 (96, 132) | **0.022** | 122 (96, 136) | 116 (79, 132) | 0.064 | 122 (97, 138) | 115 (92, 133) | 0.063 |
| **PLT** |  | 255 (203, 303) | 276 (218, 358) | **0.005** | 252 (204, 322) | 306 (231, 360) | **0.014** | 254 (203, 307) | 264 (205, 346) | 0.3 |
| **MPV** |  | 10.10 (9.40, 10.80) | 9.70 (9.20, 10.45) | **0.023** | 10.00 (9.50, 10.60) | 10.00 (9.43, 10.50) | 0.6 | 10.10 (9.50, 10.80) | 9.95 (9.50, 10.50) | 0.4 |
| **PDW** |  | 12.00 (10.70, 13.53) | 11.30 (10.05, 13.00) | **0.015** | 11.00 (9.90, 12.35) | 11.00 (9.75, 11.95) | 0.7 | 11.50 (10.22, 13.00) | 10.95 (9.85, 12.55) | 0.079 |
| **Neu** |  | 3.46 (2.63, 4.93) | 4.38 (3.19, 6.44) | **<0.001** | 3.81 (2.86, 5.24) | 4.24 (3.23, 5.46) | 0.2 | 3.56 (2.65, 4.93) | 4.72 (3.25, 6.34) | **<0.001** |
| **Lymph** |  | 1.76 (1.35, 2.19) | 1.43 (1.18, 1.98) | **0.002** | 1.54 (1.17, 2.01) | 1.35 (1.04, 1.64) | **0.016** | 1.68 (1.29, 2.13) | 1.40 (0.96, 1.76) | **<0.001** |
| **NLR** |  | 1.92 (1.42, 3.00) | 2.85 (2.01, 4.38) | **<0.001** | 2.38 (1.72, 3.81) | 3.24 (2.03, 4.66) | **0.018** | 2.09 (1.48, 3.16) | 3.48 (2.06, 5.06) | **<0.001** |
| **Alb** |  | 39.9 (35.7, 43.1) | 36.9 (32.4, 41.7) | **<0.001** | 39.6 (36.5, 42.0) | 37.5 (33.9, 42.0) | 0.084 | 39.7 (36.3, 42.9) | 37.2 (34.9, 41.1) | **0.004** |
| **Glo** |  | 26.4 (23.6, 29.7) | 26.9 (23.2, 29.6) | >0.9 | 26.0 (23.3, 28.8) | 26.8 (24.3, 30.6) | 0.15 | 26.2 (23.5, 29.3) | 26.4 (23.7, 28.9) | >0.9 |
| **PNI** | **<45** | 92 (29%) | 52 (47%) | **<0.001** | 113 (35%) | 24 (44%) | 0.2 | 173 (30%) | 31 (50%) | **<0.001** |
|  | **≥45** | 229 (71%) | 59 (53%) |  | 214 (65%) | 30 (56%) |  | 413 (70%) | 31 (50%) |  |
| **A/G** |  | 1.50 (1.30, 1.70) | 1.50 (1.15, 1.60) | **0.014** | 1.52 (1.36, 1.70) | 1.47 (1.21, 1.63) | **0.023** | 1.50 (1.31, 1.70) | 1.47 (1.22, 1.68) | 0.11 |
| **AFP** |  | 2.92 (2.32, 3.70) | 3.46 (2.13, 5.10) | **0.008** | 3 (2, 5) | 3 (2, 10) | 0.080 | 3 (2, 4) | 3 (2, 6) | 0.7 |
| **CEA** |  | 2 (1, 4) | 3 (2, 7) | **0.002** | 2.2 (1.1, 3.7) | 2.1 (1.0, 4.4) | 0.8 | 2.2 (1.2, 3.8) | 2.6 (1.3, 6.2) | 0.064 |
| **CA125** |  | 14 (10, 22) | 29 (19, 47) | **<0.001** | 11 (7, 16) | 16 (9, 26) | **0.002** | 12 (8, 18) | 16 (11, 76) | **<0.001** |
| **CA153** |  | 11.2 (7.9, 15.0) | 10.8 (8.7, 13.3) | 0.4 | 7 (6, 8) | 7 (5, 11) | 0.9 | 8.0 (6.4, 12.5) | 10.9 (6.8, 17.6) | 0.006 |
| **CA199** |  | 10 (6, 19) | 18 (7, 45) | **<0.001** | 14 (8, 29) | 17 (9, 82) | 0.055 | 11 (6, 22) | 12 (5, 31) | 0.4 |
| **CA724** |  | 2 (1, 6) | 7 (2, 20) | **<0.001** | 4 (3, 7) | 10 (4, 14) | **<0.001** | 3 (2, 6) | 6 (3, 12) | **<0.001** |
| **Site** | **0** | 6 (1.9%) | 4 (3.6%) | **0.011** | 0 (0%) | 0 (0%) | 0.9 | 6 (1.0%) | 0 (0%) | 0.2 |
|  | **1** | 68 (21%) | 23 (21%) |  | 47 (14%) | 9 (17%) |  | 108 (18%) | 7 (11%) |  |
|  | **2** | 54 (17%) | 33 (30%) |  | 33 (10%) | 5 (9.3%) |  | 74 (13%) | 13 (21%) |  |
|  | **3** | 193 (60%) | 51 (46%) |  | 247 (76%) | 40 (74%) |  | 398 (68%) | 42 (68%) |  |
| **Size** |  | 4.00 (2.50, 6.00） | 6.00 (4.22, 8.00) | **<0.001** | 3.50 (2.00, 4.50) | 5.45 (4.13, 6.63) | **<0.001** | 3.50 (2.33, 5.00) | 4.00 (3.00, 5.00) | 0.2 |
| **Hp** | **0** | 235 (73%) | 78 (70%) | 0.6 | —— | —— | —— | —— | —— | —— |
|  | **1** | 86 (27%) | 33 (30%) |  | —— | —— | —— | —— | —— | —— |

| **Characteristic** | | **Training cohort** | | **P** | **Validation cohort** | | **P** | **metachronous PM cohort** | | **P** |
| --- | --- | --- | --- | --- | --- | --- | --- | --- | --- | --- |
|  | **group** | **Non-PM *n* = 321** | **PM *n* = 111** | **Non-PM *n* = 327** | **PM *n* = 54** | **Non-PM *n* = 586** | **PM *n* =62** |
| **T** | **T1** | 61 (19%) | 11 (9.9%) | **<0.001** | 78 (24%) | 2 (3.7%) | **<0.001** | 130 (22%) | 9 (15%) | **<0.001** |
|  | **T2** | 42 (13%) | 1 (0.9%) |  | 39 (12%) | 1 (1.9%) |  | 79 (13%) | 2 (3.2%) |  |
|  | **T3** | 23 (7.2%) | 3 (2.7%) |  | 41 (13%) | 3 (5.6%) |  | 64 (11%) | 0 (0%) |  |
|  | **T4** | 194 (60%) | 94 (85%) |  | 149 (46%) | 44 (81%) |  | 301 (51%) | 42 (68%) |  |
|  | **Tis** | 1 (0.3%) | 2 (1.8%) |  | 20 (6.1%) | 4 (7.4%) |  | 12 (2.0%) | 9 (15%) |  |
| **Borrmann** | **1** | 25 (7.8%) | 0 (0%) | **<0.001** | 4 (1.2%) | 0 (0%) | 0.4 | 29 (4.9%) | 0 (0%) | **<0.001** |
|  | **2** | 70 (22%) | 2 (1.8%) |  | 32 (9.8%) | 2 (3.7%) |  | 102 (17%) | 0 (0%) |  |
|  | **3** | 222 (69%) | 90 (81%) |  | 290 (89%) | 52 (96%) |  | 450 (77%) | 62 (100%) |  |
|  | **4** | 4 (1.2%) | 19 (17%) |  | 1 (0.3%) | 0 (0%) |  | 5 (0.9%) | 0 (0%) |  |
| **Diff** | **0** | 13 (4.0%) | 3 (2.7%) | **<0.001** | 0 (0%) | 0 (0%) | 0.4 | 11 (1.9%) | 2 (3.2%) | **<0.001** |
|  | **1** | 5 (1.6%) | 0 (0%) |  | 236 (72%) | 41 (76%) |  | 201 (34%) | 40 (65%) |  |
|  | **2** | 82 (26%) | 8 (7.2%) |  | 78 (24%) | 13 (24%) |  | 154 (26%) | 6 (9.7%) |  |
|  | **3** | 221 (69%) | 100 (90%) |  | 13 (4.0%) | 0 (0%) |  | 220 (38%) | 14 (23%) |  |
| **Her2** | **0** | 243 (76%) | 91 (82%) | 0.2 | 205 (63%) | 39 (72%) | 0.2 | 406 (69%) | 42 (68%) | 0.8 |
|  | **1** | 78 (24%) | 20 (18%) |  | 122 (37%) | 15 (28%) |  | 180 (31%) | 20 (32%) |  |
| **Radiomics**  **Features** |  | 0.36 (0.27, 0.48) | 0.62 (0.46, 0.75) | **<0.001** | 0.40 (0.33, 0.50) | 0.59 (0.48, 0.67) | **<0.001** | 0.38 (0.29, 0.48) | 0.49 (0.38, 0.61) | **<0.001** |
| **TSR** | **Low** | 208 (65%) | 39 (35%) | **0.002** | 181 (55%) | 18 (33%) | **0.003** | 349 (60%) | 23 (37%) | **<0.001** |
|  | **High** | 113 (35%) | 72 (65%) |  | 146 (45%) | 36 (67%) |  | 237 (40%) | 39 (63%) |  |

*n (%); Median (IQR)

*Pearson's Chi-squared test; Wilcoxon rank sum test; Fisher's exact test
