# Supplementary material for: A Novel Multimodal Combining Radiomics and Tumor-Stroma Ratio (TSR) Improves Diagnosis of Gastric Cancer Peritoneal Metastasis
Source: Research Square preprint supplement (doi:10.21203/rs.3.rs-7336599/v1), 2025-09-03
Supplement: Supplementary file 3 [file e32eded5b18237c62c2e261b.docx]

A Novel Multimodal Combining Radiomics and Tumor-Stroma Ratio (TSR) Improves Diagnosis of Gastric Cancer Peritoneal Metastasis

Lin Zhongab†, Ting Lin c†, Dong Houb, Hongyun Huang d, Shihai Zhou e, Yu Lin f, Yue Yuef, Liangquan Liua, Jing Luoa*, Fanghai Han g*, Lang Xieh*

a Department of Breast Surgery, Sichuan Provincial People’s Hospital, School of Medicine, University of Electronic Science and Technology of China,Chengdu, Sichuan, China，610072;

b Department of Gastrointestinal Surgery, Sun Yat-sen Memorial Hospital, Sun Yat-sen University, Guangzhou, Guangdong, China, 510120;

c Department of imaging, Zhujiang Hospital, Southern Medical University, Guangzhou, Guangdong, China, 510280;

d Department of General Surgery, Peking Union Medical College Hospital, Chinese Academy of Medical Science and Peking Union Medical College, Beijing, China, 100010;

e Department of Tumor Surgery, Zhongshan City People’s Hospital, Zhongshan, Guangdong, China, 528403;

f Department of Pathology, Zhujiang Hospital, Southern Medical University, Guangzhou Guangdong, China, 510282;

g.Department of Gastrointestinal Surgery, The Affiliated Guangdong Second Provincial General Hospital of Jinan University, Guangzhou, Guangdong, China, 510403;

h Department of General surgery, Zhujiang Hospital, Southern Medical University, Guangzhou, Guangdong, China, 510280.

**†** *Lin Zhong* and Ting Lin made equal contributions to this work.

***Corresponding author:**

Jing Luo, Department of Breast Surgery, Sichuan Provincial People’s Hospital, School of Medicine, University of Electronic Science and Technology of China,Chengdu, Sichuan, China，610072. luckyluojy@163.com.

Fanghai Han, The Affiliated Guangdong Second Provincial General Hospital of Jinan University, Guangzhou, Guangdong, China, 510403. fh_han@163.com.

Lang Xie, Department of General surgery, Zhujiang Hospital, Southern Medical University, Guangzhou, Guangdong, China, 510280. langxiezj@hotmail.com.

**Methods**

**Steps in Radiomics Workflow.**

The specific steps for image acquisition, feature extraction, and machine learning are as follows:

**Image acquisition**

All patients underwent standard iodine enhanced CT scans before surgery. CT images from Zhu jiang Hospital, Southern Medical University were acquired using one of two multi-detector row CT scanners (Brilliance iCT 256; Philips Healthcare; Brilliance 64-slice CT; Philips Healthcare). The CT images acquisition parameters were as follows: tube voltage, 120K Vp; auto tube current; detector collimation: 128×0.625mm or 64×0.625mm; field of view, 350mm×350mm; matrix, 512×512. Images from Zhongshan City People's Hospital were obtained using one of two multi-detector row CT scanners (Somatom Emotion 16; SIEMENS; Brilliance iCT 256; Philips Healthcare). Images were reconstructed with a slice thickness of 5mm in Zhu jiang Hospital and Zhongshan City People's Hospital. The CT images acquisition parameters were as follows: tube voltage, 120K Vp; auto tube current; detector collimation: 16×1.2 mm or 128×0.625mm; field of view, 330mm×330mm or 350mm×350mm; matrix, 512×512. Nonionic iodinated contrast material (370 mg iodine/mL, Ultravist, Bayer Schering Pharma) was injected into the antecubital vein at a dose of 1.5mL/kg of body weight at a rate of 2.5mL/s with a pump injector (Ulrich CT Plus 150, Ulrich Medical). Contrast-enhanced CT scanning was performed with a 60-second delay after the contrast agent injection.

**Tumor segmentation**

All CT images were obtained from the picture archiving and communication system (PACS). A radiologist with 7 years of experience in abdominal CT reading manually delineated the volumes of interest (VOI) covering the entire tumor on consecutive slices using ITK-SNAP (version 3.8.0; <http://www.itksnap.org/>). To guarantee the robustness of the aforementioned features, we analyzed the interobserver reproducibility. Another radiologist, with 5 years of experience in abdominal CT interpretation, randomly chose and segmented 50 cases. Features with intraclass correlation coefficients (ICCs) greater than 0.75 were considered to demonstrate good agreement in reproducibility.

**Machine learning process**

Radiomics features were extracted using Pyradiomics (<http://pyradiomics.readthedocs.io/en/latest/index.html>) based on VOIs from the contrast-enhanced CT images of each patient. To improve grammatical correctness and readability: "The features include the following categories: (1) first-order statistics; (2) shape properties; (3) texture properties, including Gray Level Co-occurrence Matrix, Gray Level Size Zone Matrix, Gray Level Run Length Matrix, Neighboring Gray Tone Difference Matrix, and Gray Level Dependence Matrix; (4) higher order statistics, which include first-order statistics and texture properties after transformation of the original images, such as wavelet transform, square, square root, Laplacian of Gaussian, logarithm, exponential, gradient, local binary pattern (2D), and local binary pattern (3D). We then applied normalization and standardization on the feature matrix.

The samples were randomly divided into training cohort (n=302, 70%) and test cohort (n=130, 30%).In order to lower the imbalance impact of samples distribution, the upsampling technique algorithm was used in the training set. Principal component analysis (PCA) was applied to reduce the features to certain principal components. This reduction in the number of variables relative to the sample size effectively helps to avoid overfitting of the machine learning algorithm and to generate a more reliable prediction model. Before building the model, we used analysis of variance (ANOVA) to select features. Finally, we picked the best-behaved features; the selection was based on F-values calculated to evaluate the relationship between features and the labels. We sorted features according to the corresponding F-value and selected a specific number of features to build the model. We used a Gaussian process (GP) as the machine learning classifier. To prove the performance of the model, we applied 10-fold cross-validation on the data set.

Then, the test cohort and external validation cohort were utilized to validate the predictive power of this model. Receiver operating characteristic (ROC) curves were measured for the discriminating power of the prediction model. Then, the area under the ROC curve (AUC) was calculated for quantification. All these processes were implemented with FeAture Explorer (FAE, v0.2.5, https://github.com/salan668/FAE) on Python (3.6.8, <https://www.python.org/>).

1. **b**.


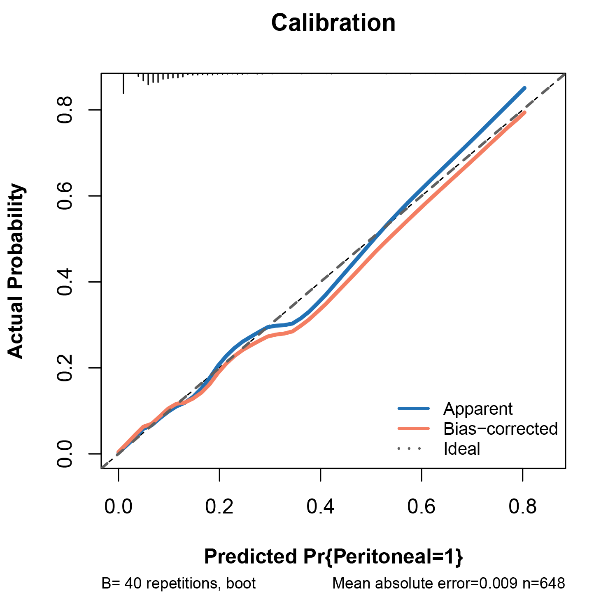


**Calibration**

**Actual probability**

**Predicted Pr{PM=1}**

B= 40 repetitions, boot

Mean absolute error=0.009 n=648

**0.0**

**0.2**

**0.4**

**0.6**

**0.8**

**0.0**

**0.2**

**0.4**

**0.6**

**0.8**


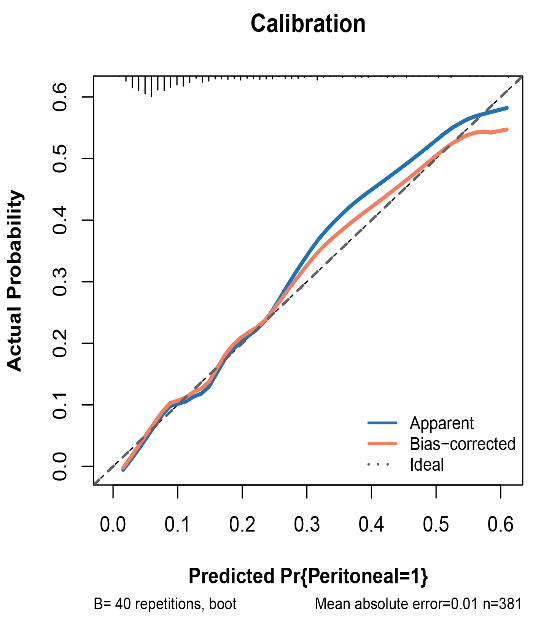


**Calibration**

**Actual probability**

**Predicted Pr{PM=1}**

B= 40 repetitions, boot

Mean absolute error=0.001 n=381

**0.0**

**0.1**

**0.2**

**0.3**

**0.4**

**0.0**

**0.1**

**0.2**

**0.3**

**0.4**

**0.5**

**0.5**

**0.6**

**0.6**

**Supplemental Fig. 1. Model Performance and Validation.** a.Calibration curve of the model in the validation cohort; b. Calibration curve of the model in the metachronous PM cohort. The blue line represents the performance of the nomogram, while the red line corrects any bias in the nomogram. The dotted line represents the reference line where the ideal nomogram is located.
